# Supplementary material for: Comparison of glyburide and insulin in the management of gestational diabetes: A meta-analysis
Source: PubMed Central journal article supplement (PMC5542468; doi:10.1371/journal.pone.0182488), 2017-08-03
Supplement: pone.0182488.s001.pdf [file pone.0182488.s001.pdf]

**S1 Table. Search strategy.**

**PubMed**

|     |                                                                                                                |         |  |
|-----|----------------------------------------------------------------------------------------------------------------|---------|--|
| #1  | “Diabetes, Gestational”[MeSH]                                                                                  | 8720    |  |
| #2  | Diabetes, Pregnancy-Induced[tiab]                                                                              | 0       |  |
| #3  | Diabetes, Pregnancy Induced[tiab]                                                                              | 0       |  |
| #4  | Pregnancy-Induced Diabetes[tiab]                                                                               | 10      |  |
| #5  | Gestational Diabetes[tiab]                                                                                     | 9903    |  |
| #6  | Diabetes Mellitus, Gestational[tiab]                                                                           | 1       |  |
| #7  | Gestational Diabetes Mellitus[tiab]                                                                            | 5253    |  |
| #8  | #1 or #2 or #3 or #4 or #5 or #6 or #7                                                                         | 12739   |  |
| #9  | “Glyburide”[MeSH]                                                                                              | 5811    |  |
| #10 | Glybenclamide[tiab]                                                                                            | 447     |  |
| #11 | Glibenclamide[tiab]                                                                                            | 7483    |  |
| #12 | Diabeta[tiab]                                                                                                  | 8       |  |
| #13 | Euglucon 5[tiab]                                                                                               | 6       |  |
| #14 | Neogluconin[tiab]                                                                                              | 1       |  |
| #15 | HB-419[tiab]                                                                                                   | 88      |  |
| #16 | HB 419[tiab]                                                                                                   | 88      |  |
| #17 | HB419[tiab]                                                                                                    | 8       |  |
| #18 | HB-420[tiab]                                                                                                   | 7       |  |
| #19 | HB 420[tiab]                                                                                                   | 7       |  |
| #20 | HB420[tiab]                                                                                                    | 1       |  |
| #21 | Maninil[tiab]                                                                                                  | 15      |  |
| #22 | Micronase[tiab]                                                                                                | 4       |  |
| #23 | Daonil[tiab]                                                                                                   | 44      |  |
| #24 | Euglucon N[tiab]                                                                                               | 6       |  |
| #25 | #9 or #10 or #11 or #12 or #13 or #14 or #15 or #16 or #17 or #18 or #19<br>or #20 or #21 or #22 or #23 or #24 | 9760    |  |
| #26 | randomized controlled trial                                                                                    | 536766  |  |
| #27 | controlled clinical trial                                                                                      | 613273  |  |
| #28 | randomized                                                                                                     | 727135  |  |
| #29 | placebo                                                                                                        | 193825  |  |
| #30 | drug therapy                                                                                                   | 2706504 |  |
| #31 | randomly                                                                                                       | 259820  |  |
| #32 | trial                                                                                                          | 1152022 |  |
| #33 | groups                                                                                                         | 1729302 |  |
| #34 | #26 or #27 or #28 or #29 or #30 or #31 or #32 or #33                                                           | 4837848 |  |
| #35 | #8 and #25 and #34                                                                                             | 121     |  |

## EMBASE

|     |                                                                                                                 |        |
|-----|-----------------------------------------------------------------------------------------------------------------|--------|
| #1  | 'Pregnancy diabetes mellitus'/exp                                                                               | 25846  |
| #2  | 'Diabetes, Gestational':ab,ti                                                                                   | 201    |
| #3  | 'Diabetes, Pregnancy-Induced':ab,ti                                                                             | 34     |
| #4  | 'Diabetes, Pregnancy Induced':ab,ti                                                                             | 34     |
| #5  | 'Pregnancy-Induced Diabetes':ab,ti                                                                              | 9      |
| #6  | 'Gestational Diabetes':ab,ti                                                                                    | 15032  |
| #7  | 'Diabetes Mellitus, Gestational':ab,ti                                                                          | 58     |
| #8  | 'Gestational Diabetes Mellitus':ab,ti                                                                           | 7139   |
| #9  | #1 or #2 or #3 or #4 or #5 or #6 or #7 or #8                                                                    | 27146  |
| #10 | 'Glibenclamide'/exp                                                                                             | 21997  |
| #11 | 'Glybenclamide':ab,ti                                                                                           | 564    |
| #12 | 'Glyburide':ab,ti                                                                                               | 1854   |
| #13 | 'Diabeta':ab,ti                                                                                                 | 688    |
| #14 | 'Euglucon 5':ab,ti                                                                                              | 10     |
| #15 | 'Neogluconin':ab,ti                                                                                             | 1      |
| #16 | 'HB-419':ab,ti                                                                                                  | 95     |
| #17 | 'HB 419':ab,ti                                                                                                  | 95     |
| #18 | 'HB419':ab,ti                                                                                                   | 9      |
| #19 | 'HB-420':ab,ti                                                                                                  | 10     |
| #20 | 'HB 420':ab,ti                                                                                                  | 10     |
| #21 | 'HB420':ab,ti                                                                                                   | 1      |
| #22 | 'Maninil':ab,ti                                                                                                 | 19     |
| #23 | 'Micronase':ab,ti                                                                                               | 28     |
| #24 | 'Daonil':ab,ti                                                                                                  | 72     |
| #25 | 'Euglucon N':ab,ti                                                                                              | 10     |
| #26 | #10 or #11 or #12 or #13 or #14 or #15 or #16 or #17 or #18 or #19<br>or #20 or #21 or #22 or #23 or #24 or #25 | 23015  |
| #27 | 'Randomized controlled trial'/exp                                                                               | 415659 |
| #28 | #9 and #26 and #27                                                                                              | 26     |

**CENTRAL (Cochrane Central Register of Controlled Trials)**

|     |                                                                                                                 |                                 |
|-----|-----------------------------------------------------------------------------------------------------------------|---------------------------------|
| #1  | MeSH descriptor: [Diabetes, Gestational] explode all trees                                                      | 479                             |
| #2  | Diabetes, Pregnancy-Induced:ti,ab                                                                               | 47                              |
| #3  | Diabetes, Pregnancy Induced:ti,ab                                                                               | 99                              |
| #4  | Pregnancy-Induced Diabetes:ti,ab                                                                                | 47                              |
| #5  | Gestational Diabetes:ti,ab                                                                                      | 1086                            |
| #6  | Diabetes Mellitus, Gestational:ti,ab                                                                            | 829                             |
| #7  | Gestational Diabetes Mellitus:ti,ab                                                                             | 829                             |
| #8  | Pregnancy diabetes mellitus:ti,ab                                                                               | 1024                            |
| #9  | #1 or #2 or #3 or #4 or #5 or #6 or #7 or #8                                                                    | 1385                            |
| #10 | MeSH descriptor: [Glyburide] explode all trees                                                                  | 507                             |
| #11 | Glybenclamide:ti,ab                                                                                             | 6                               |
| #12 | Glibenclamide:ti,ab                                                                                             | 783                             |
| #13 | Diabeta:ti,ab                                                                                                   | 2                               |
| #14 | Euglucon 5:ti,ab                                                                                                | 9                               |
| #15 | Neogluconin:ti,ab                                                                                               | 1                               |
| #16 | HB-419:ti,ab                                                                                                    | 8                               |
| #17 | HB 419:ti,ab                                                                                                    | 11                              |
| #18 | HB419:ti,ab                                                                                                     | 5                               |
| #19 | HB-420:ti,ab                                                                                                    | 8                               |
| #20 | HB 420:ti,ab                                                                                                    | 17                              |
| #21 | HB420:ti,ab                                                                                                     | 1                               |
| #22 | Maninil:ti,ab                                                                                                   | 3                               |
| #23 | Micronase:ti,ab                                                                                                 | 5                               |
| #24 | Daonil:ti,ab                                                                                                    | 13                              |
| #25 | Euglucon N:ti,ab                                                                                                | 9                               |
| #26 | #10 or #11 or #12 or #13 or #14 or #15 or #16 or #17 or #18 or #19<br>or #20 or #21 or #22 or #23 or #24 or #25 | 980                             |
| #27 | #9 and #26                                                                                                      | 30 (27 Trials; 3 Other Reviews) |
