# Supplementary material for: Comparison of glyburide and insulin in the management of gestational diabetes: A meta-analysis
Source: PubMed Central journal article supplement (PMC5542468; doi:10.1371/journal.pone.0182488), 2017-08-03
Supplement: pone.0182488.s002.pdf [file pone.0182488.s002.pdf]

**S2 Table. Summary of meta-analysis outcomes comparing glyburide with insulin in women with gestational diabetes. Sensitivity analysis.**

|                    |                   | Outcomes                                   | No. of studies | No. of patients treated with glyburide | No. of patients treated with insulin | Mean difference (95% CI) | Relative risk (95% CI) | P value | I <sup>2</sup> value |
|--------------------|-------------------|--------------------------------------------|----------------|----------------------------------------|--------------------------------------|--------------------------|------------------------|---------|----------------------|
| Primary outcomes   | Maternal outcomes | HbA1c level at end of third trimester (%)  | 3              | 241                                    | 246                                  | -0.03(-0.25 to 0.18)     | —                      | 0.75    | 52                   |
|                    |                   | Severe maternal hypoglycaemia (%)          | 4              | 265                                    | 273                                  | —                        | 0 v 0                  | —       | —                    |
|                    |                   | Pre-eclampsia (%)                          | 3              | 270                                    | 294                                  | —                        | 0.98(0.56 to 1.74)     | 0.95    | 0                    |
|                    |                   | Maternal weight gain during pregnancy (kg) | 3              | 257                                    | 266                                  | -1.13(-2.47 to 0.21)     | —                      | 0.1     | 0                    |
|                    |                   | Caesarean section (%)                      | 5              | 337                                    | 370                                  | —                        | 0.93(0.78 to 1.12)     | 0.45    | 0                    |
|                    |                   | Gestational age at delivery (weeks)        | 6              | 389                                    | 414                                  | 0.06(-0.16 to 0.28)      | —                      | 0.57    | 0                    |
|                    | Neonatal outcomes | Preterm birth (%)                          | 4              | 129                                    | 136                                  | —                        | 1.04(0.50 to 2.16)     | 0.92    | 0                    |
|                    |                   | Birth weight (g)                           | 9              | 455                                    | 490                                  | 109.16(42.59 to 175.72)  | —                      | 0.001   | 0                    |
|                    |                   | Macrosomia (%)                             | 7              | 397                                    | 428                                  | —                        | 2.48(1.38 to 4.44)     | 0.002   | 30                   |
|                    |                   | Large for gestational age (%)              | 5              | 328                                    | 337                                  | —                        | 2.54(0.98 to 6.57)     | 0.05    | 61                   |
|                    |                   | Small for gestational age (%)              | 2              | 65                                     | 68                                   | —                        | 1.05(0.05 to 22.10)    | 0.97    | 52                   |
|                    |                   | Any neonatal hypoglycaemia (%)             | 9              | 447                                    | 486                                  | —                        | 2.29(1.49 to 3.54)     | 0.0002  | 13                   |
|                    |                   | Perinatal mortality (%)                    | 5              | 319                                    | 328                                  | —                        | 1.00(0.25 to 3.97)     | 0.99    | 0                    |
| Secondary outcomes | Maternal outcomes | Fasting blood glucose (mmol/L)             | 3              | 274                                    | 280                                  | 1.19(-1.12 to 3.50)      | —                      | 0.31    | 0                    |
|                    |                   | Postprandial blood glucose (mmol/L)        | 3              | 274                                    | 280                                  | 1.15(-2.00 to 4.31)      | —                      | 0.47    | 0                    |
|                    |                   | Maternal weight gain since entry (kg)      | 0              | —                                      | —                                    | —                        | —                      | —       | —                    |
|                    |                   | Pregnancy induced hypertension (%)         | 0              | —                                      | —                                    | —                        | —                      | —       | —                    |
|                    |                   | Induction (%)                              | 0              | —                                      | —                                    | —                        | —                      | —       | —                    |
|                    |                   | Maternal trauma (%)                        | 2              | 73                                     | 77                                   | —                        | 0 v 0                  | —       | —                    |
|                    |                   | Assisted vaginal delivery (%)              | 0              | —                                      | —                                    | —                        | —                      | —       | —                    |
|                    |                   | Cord C peptide (ng/mL)                     | 1              | 31                                     | 28                                   | 0.20(-0.42 to 0.82)      | —                      | 0.53    | —                    |
|                    |                   | Cord insulin (IU/mL)                       | 3              | 242                                    | 244                                  | -0.62(-2.93 to 1.69)     | —                      | 0.60    | 0                    |
|                    | Neonatal outcomes | 1 minute Apgar score <7 (%)                | 0              | —                                      | —                                    | —                        | —                      | —       | —                    |
|                    |                   | 5 minute Apgar score <7 (%)                | 0              | —                                      | —                                    | —                        | —                      | —       | —                    |
|                    |                   | Severe neonatal hypoglycemia (%)           | 4              | 133                                    | 163                                  | —                        | 4.67(0.80 to 27.22)    | 0.09    | 0                    |
|                    |                   | Neonatal hyperbilirubinemia (%)            | 3              | 263                                    | 265                                  | —                        | 1.72(0.75 to 3.94)     | 0.20    | 0                    |
| Phototherapy (%)   |                   | 2                                          | 67             | 89                                     | —                                    | 0.96(0.74 to 1.24)       | 0.75                   | 29      |                      |
|                    |                   | Neonatal respiratory distress syndrome (%) | 4              | 292                                    | 319                                  | —                        | 0.73(0.32 to 1.66)     | 0.46    | 0                    |

**S2 Table. Summary of meta-analysis outcomes comparing glyburide with insulin in women with gestational diabetes. Sensitivity analysis (Continued).**

| Outcomes           |                   | No. of studies             | No. of patients treated with glyburide | No. of patients treated with insulin | Mean difference (95% CI) | Relative risk (95% CI) | P value             | I <sup>2</sup> value |   |
|--------------------|-------------------|----------------------------|----------------------------------------|--------------------------------------|--------------------------|------------------------|---------------------|----------------------|---|
| Secondary outcomes | Neonatal outcomes | Stillbirth (%)             | 2                                      | 233                                  | 235                      | —                      | 1.68(0.22 to 12.52) | 0.62                 | 0 |
|                    |                   | Neonatal mortality (%)     | 3                                      | 274                                  | 280                      | —                      | 1.01(0.06 to 16.04) | 0.99                 | — |
|                    |                   | NICU admission (%)         | 5                                      | 341                                  | 365                      | —                      | 0.95(0.58 to 1.57)  | 0.85                 | 0 |
|                    |                   | Congenital abnormality (%) | 5                                      | 343                                  | 369                      | —                      | 1.31(0.55 to 3.13)  | 0.54                 | 0 |
|                    |                   | Hypocalcemia (%)           | 3                                      | 270                                  | 294                      | —                      | 1.01(0.14 to 7.10)  | 0.99                 | — |
|                    |                   | Polycythemia (%)           | 3                                      | 270                                  | 294                      | —                      | 0.67(0.19 to 2.35)  | 0.54                 | — |
|                    |                   | Birth trauma (%)           | 3                                      | 97                                   | 104                      | —                      | 0 v 0               | —                    | — |
|                    |                   | Shoulder dystocia (%)      | 1                                      | 41                                   | 41                       | —                      | 0.50(0.05 to 5.30)  | 0.57                 | — |
|                    |                   | Head circumference (cm)    | 1                                      | 41                                   | 41                       | 0.30(-0.31 to 0.91)    | —                   | 0.33                 | — |
|                    |                   | Arm circumference (cm)     | 1                                      | 41                                   | 41                       | 0.20(-0.22 to 0.62)    | —                   | 0.35                 | — |
|                    |                   | Chest circumference (cm)   | 1                                      | 41                                   | 41                       | 0.80(0.07 to 1.53)     | —                   | 0.03                 | — |

Abbreviations are as follows: CI, confidence interval; I<sup>2</sup>, heterogeneity; HbA1c, glycated haemoglobin; NICU, neonatal intensive care unit.
